# Supplementary material for: Contrasting energy flow associated with tropical and subtropical reef fish assemblages
Source: Research Square preprint supplement (doi:10.21203/rs.3.rs-5359712/v1), 2024-11-18
Supplement: Supplementary file 1 [file d4a5454c139fdfd3b1148442.docx]

Supporting Information

**Contrasting energy flow associated with tropical and subtropical reef fish assemblages**

Chia-Hung Eric Liu1, Lauriane Ribas-Deulofeu1,2, Meng-Hsin Morris Wu1, Yi-Jay Chang1, Vianney Denis1,2*

1Institute of Oceanography, National Taiwan University, Taipei 10617, Taiwan

2Ocean Center, National Taiwan University, Taipei 10617, Taiwan

*Corresponding author: vianneydenis@ntu.edu.tw; +886-3366-1393

**ORCID**

Chia-Hung Eric Liu: 0009-0001-6680-3637

Lauriane Ribas-Deulofeu: 0000-0001-9005-5547

Meng-Hsin Morris Wu: 0009-0006-6805-1084

Yi-Jay Chang: 0000-0002-7472-4672

Vianney Denis: 0000-0002-0914-5586

# Data resources of extrinsic variables

Mean sea surface temperature (℃) data were obtained from the NOAA Global Coral Bleaching Monitoring Program, which provides satellite data at 5 km resolution (Liu et al. 2014). Monthly data from 2016 to 2021 were averaged to capture the long-term impacts of temperature on fish populations. Primary production (mg m-2 day-1) data were obtained from European Union-Copernicus Marine Service (2022), which provides monthly gridded data from 2016 to 2021 and subsequently averaged at 4 km resolution. Photosynthetically available radiation (Einstein m-2 day-1) was used as the proxy of light intensity. Monthly gridded data with a 4 km resolution from 2016 to 2021 were accessed from the NASA Goddard Space Flight Center (2017). Human population (inhabitant km-2) data were obtained from the Center for International Earth Science Information Network - CIESIN - Columbia University (2018). These data provide estimates of 2020 population numbers at 1 km resolution. Population numbers were adjusted to fit United Nations country totals.

# Averaging principles for growth parameters in fish species challenging

**to identify**

Coral reef fishes have a variety of characteristics, some of which are crucial for species identification, such as the number of scales or the pattern of bands. However, due to the limitations of the blurred images, it was sometimes difficult to accurately distinguished these features. Nonetheless, certain species may share similar body structure, life history traits, and feeding behavior leading to comparable energy flows using an individual age framework (Morais and Bellwood 2020). Here, we averaged growth parameters (Bayesian length-weight growth coefficient: a and b) to assess the energy flows of two fish genera common in Taiwan, *Stegastes sp.* and *Acanthurus sp.* Parameters were derived from a combination of morphological characteristics and distribution information available in Taiwan Fish Database (Shao 2024) and local illustrated handbooks (Lee and Chao 2020, 2022).

1. *Stegastes sp.*: average parameters of *S. nigricans*, *S. albifasciatus*, and *Plectroglyphidodon fasciolatus*, which are common in tropical coral reefs in Taiwan.
2. *Acanthurus sp.*: average parameters of *A. nigrofuscus*, *Ctenochaetus binotus*, and *C. striatus*, which are common in tropical and subtropical regions around Taiwan.

# Selection of intrinsic variables

1. Rare morpho-functional groups

A total of 27 morpho-functional groups were recorded in our dataset. If the proportion of a morpho-functional group in all transects was less than 5%, it was classified as a rare group and removed. Ultimately, data filtering resulted in 13 morpho-functional groups.

1. Multicollinearity by

Multicollinearity was examined using the variance inflation factor (VIF) through a stepwise procedure. None of the 14 intrinsic variables showed a collinearity problem, so no additional variable was excluded.

# Variable selections of extrinsic variables

Test of multicollinearity by VIF factor through a stepwise procedure among the 13 extrinsic variables. Fine-scale slope, rough-scale slope, and sea surface temperature had VIF values higher than 10, revealing collinearity problems. Therefore, the three variables were removed from the generalized linear mixed models hereafter.

Table S1 List of morpho-functional groups recorded in our survey.Morpho-functional groups adapted from Lin and Denis (2019). A total of 27 morpho-functional groups were recorded in our surveys. The abbreviations of various taxonomic groups and morphological types are given in brackets after the names.

| Taxonomic group | Morphological type |
| --- | --- |
| Hard coral (HC) | *7 categories*  Arborescent  Bushy  Columnar  Encrusting  Foliose  Massive  Tabular |
| Octocoral (OC) | *7 categories*  Arborescent  Bushy  Clustered  Digitate  Encrusting  Lobate  Massive |
| Anemone (AN) | *1 category*  Encrusting |
| Algae (AL) | *3 categories*  Articulated calcareous (artcal)  Corticated foliose (cortfol)  Corticated macrophyte (cortmac) |
| Turf |  |
| Crustose coralline algae (CCA) |  |
| Seagrass (SG) |  |
| Sponge (SP) | *3 categories*  Branching  Encrusting  Massive |
| Zoantharian (ZO) | *1 category*  Encrusting |
| Ascidian (AS) | *1 category*  Erect single (eresin) |
| Cyanobacteria | *1 category*  Filamentous |

**Table S2 Metrics of structural complexities: definitions, ecological meanings, and scales.**

| **Metric** | **Definition** | **Ecological meaning** | **Scale** | **Reference** |
| --- | --- | --- | --- | --- |
| Slope | The maximum change in elevation between the cell and its neighbor cells | Reflect the steepness of a terrain. | Rough scale: 32 cm  Fine scale: 4 cm | Kennelly (2009); Zevenbergen and Thorne (1987) |
| Planform curvature | The second derivative of heights perpendicular to the directions of maximal slope. | Reflect holes and crevices in the surface topography. | Rough scale: 32 cm  Fine scale: 4 cm | Helder et al. (2022); Zevenbergen and Thorne (1987) |
| Profile curvature | The second derivative of heights parallel to the directions of maximal slope. | Reflect holes and crevices in the surface topography. | Rough scale:32 cm  Fine scale: 4 cm | Helder et al. (2022);  Zevenbergen and Thorne (1987) |
| Surface complexity | The ratio of surface area to planar area, corresponding to traditional rugosity index (2D). | Reflect the roughness of surface topography. | Estimated at 1 cm resolution | Jenness (2004); Walbridge et al. (2018) |

**Table S3 Results of the pairwise Wilcoxon tests between the five trophic groups for the three metrics of energy flow in different regions.** The Group1 and Group2 columns show the compared dietary groups in the pairwise tests, while n1 and n2 indicate the sample sized in group1 and group2, respectively. Statistic is given as Wilcoxon test’s statistic used to compute *p*-value. The adjusted *p*-value refers to the *p*-values after Bonferroni adjustment. The significance is given as ns: non-significant; *: *p*<0.05; **: *p*<0.01; ***: *p*<0.001.

| Region | **Variable** | **Group1** | **Group2** | **n1** | **n2** | **Statistic** | **Adjusted *p*-value** | **Significance** |
| --- | --- | --- | --- | --- | --- | --- | --- | --- |
| Sub | Biomass | Herbivore | Planktivore | 23 | 25 | 217 | 1 | ns |
| Sub | Biomass | Herbivore | Omnivore | 23 | 9 | 173 | 0.026 | * |
| Sub | Biomass | Herbivore | Invertivore | 23 | 25 | 317 | 1 | ns |
| Sub | Biomass | Herbivore | Carnivore | 23 | 6 | 90 | 1 | ns |
| Sub | Biomass | Planktivore | Omnivore | 25 | 9 | 198 | 0.004 | ** |
| Sub | Biomass | Planktivore | Invertivore | 25 | 25 | 414 | 0.494 | ns |
| Sub | Biomass | Planktivore | Carnivore | 25 | 6 | 110 | 0.846 | ns |
| Sub | Biomass | Omnivore | Invertivore | 9 | 25 | 44 | 0.062 | ns |
| Sub | Biomass | Omnivore | Carnivore | 9 | 6 | 10 | 0.496 | ns |
| Sub | Biomass | Invertivore | Carnivore | 25 | 6 | 87 | 1 | ns |
| Trans | Biomass | Herbivore | Planktivore | 25 | 16 | 364 | <0.001 | *** |
| Trans | Biomass | Herbivore | Omnivore | 25 | 15 | 338 | <0.001 | *** |
| Trans | Biomass | Herbivore | Invertivore | 25 | 23 | 451 | 0.005 | ** |
| Trans | Biomass | Herbivore | Carnivore | 25 | 7 | 113 | 1 | ns |
| Trans | Biomass | Planktivore | Omnivore | 16 | 15 | 71 | 0.544 | ns |
| Trans | Biomass | Planktivore | Invertivore | 16 | 23 | 99 | 0.146 | ns |
| Trans | Biomass | Planktivore | Carnivore | 16 | 7 | 12 | 0.02 | * |
| Trans | Biomass | Omnivore | Invertivore | 15 | 23 | 130 | 1 | ns |
| Trans | Biomass | Omnivore | Carnivore | 15 | 7 | 19 | 0.172 | ns |
| Trans | Biomass | Invertivore | Carnivore | 23 | 7 | 49 | 1 | ns |
| Trop1 | Biomass | Herbivore | Planktivore | 25 | 25 | 448 | 0.08 | ns |
| Trop1 | Biomass | Herbivore | Omnivore | 25 | 23 | 528 | <0.001 | *** |
| Trop1 | Biomass | Herbivore | Invertivore | 25 | 25 | 402 | 0.842 | ns |
| Trop1 | Biomass | Herbivore | Carnivore | 25 | 1 | 21 | 1 | ns |
| Trop1 | Biomass | Planktivore | Omnivore | 25 | 23 | 373 | 0.793 | ns |
| Trop1 | Biomass | Planktivore | Invertivore | 25 | 25 | 230 | 1 | ns |
| Trop1 | Biomass | Planktivore | Carnivore | 25 | 1 | 10 | 1 | ns |
| Trop1 | Biomass | Omnivore | Invertivore | 23 | 25 | 69 | <0.001 | *** |
| Trop1 | Biomass | Omnivore | Carnivore | 23 | 1 | 3 | 1 | ns |
| Trop1 | Biomass | Invertivore | Carnivore | 25 | 1 | 18 | 1 | ns |
| Trop2 | Biomass | Herbivore | Planktivore | 25 | 24 | 496 | <0.001 | *** |
| Trop2 | Biomass | Herbivore | Omnivore | 25 | 22 | 519 | <0.001 | *** |
| Trop2 | Biomass | Herbivore | Invertivore | 25 | 25 | 487 | 0.005 | ** |
| Trop2 | Biomass | Herbivore | Carnivore | 25 | 8 | 195 | <0.001 | *** |
| Trop2 | Biomass | Planktivore | Omnivore | 24 | 22 | 343 | 0.843 | ns |
| Trop2 | Biomass | Planktivore | Invertivore | 24 | 25 | 231 | 1 | ns |
| Trop2 | Biomass | Planktivore | Carnivore | 24 | 8 | 132 | 1 | ns |
| Trop2 | Biomass | Omnivore | Invertivore | 22 | 25 | 100 | 0.001 | ** |
| Trop2 | Biomass | Omnivore | Carnivore | 22 | 8 | 91 | 1 | ns |
| Trop2 | Biomass | Invertivore | Carnivore | 25 | 8 | 174 | 0.011 | * |
| Trop3 | Biomass | Herbivore | Planktivore | 21 | 20 | 370 | <0.001 | *** |
| Trop3 | Biomass | Herbivore | Omnivore | 21 | 19 | 331 | 0.002 | ** |
| Trop3 | Biomass | Herbivore | Invertivore | 21 | 24 | 372 | 0.057 | ns |
| Trop3 | Biomass | Herbivore | Carnivore | 21 | 4 | 71 | 0.307 | ns |
| Trop3 | Biomass | Planktivore | Omnivore | 20 | 19 | 146 | 1 | ns |
| Trop3 | Biomass | Planktivore | Invertivore | 20 | 24 | 159 | 0.572 | ns |
| Trop3 | Biomass | Planktivore | Carnivore | 20 | 4 | 32 | 1 | ns |
| Trop3 | Biomass | Omnivore | Invertivore | 19 | 24 | 185 | 1 | ns |
| Trop3 | Biomass | Omnivore | Carnivore | 19 | 4 | 35 | 1 | ns |
| Trop3 | Biomass | Invertivore | Carnivore | 24 | 4 | 61 | 1 | ns |
| Sub | Productivity | Herbivore | Planktivore | 23 | 25 | 40 | <0.001 | *** |
| Sub | Productivity | Herbivore | Omnivore | 23 | 9 | 162 | 0.13 | ns |
| Sub | Productivity | Herbivore | Invertivore | 23 | 25 | 216 | 1 | ns |
| Sub | Productivity | Herbivore | Carnivore | 23 | 6 | 107 | 0.412 | ns |
| Sub | Productivity | Planktivore | Omnivore | 25 | 9 | 222 | <0.001 | *** |
| Sub | Productivity | Planktivore | Invertivore | 25 | 25 | 540 | <0.001 | *** |
| Sub | Productivity | Planktivore | Carnivore | 25 | 6 | 148 | <0.001 | *** |
| Sub | Productivity | Omnivore | Invertivore | 9 | 25 | 29 | 0.006 | ** |
| Sub | Productivity | Omnivore | Carnivore | 9 | 6 | 19 | 1 | ns |
| Sub | Productivity | Invertivore | Carnivore | 25 | 6 | 120 | 0.231 | ns |
| Trans | Productivity | Herbivore | Planktivore | 25 | 16 | 305 | 0.043 | * |
| Trans | Productivity | Herbivore | Omnivore | 25 | 15 | 344 | <0.001 | *** |
| Trans | Productivity | Herbivore | Invertivore | 25 | 23 | 427 | 0.035 | * |
| Trans | Productivity | Herbivore | Carnivore | 25 | 7 | 147 | 0.051 | ns |
| Trans | Productivity | Planktivore | Omnivore | 16 | 15 | 117 | 1 | ns |
| Trans | Productivity | Planktivore | Invertivore | 16 | 23 | 129 | 1 | ns |
| Trans | Productivity | Planktivore | Carnivore | 16 | 7 | 35 | 1 | ns |
| Trans | Productivity | Omnivore | Invertivore | 15 | 23 | 77 | 0.036 | * |
| Trans | Productivity | Omnivore | Carnivore | 15 | 7 | 23 | 0.387 | ns |
| Trans | Productivity | Invertivore | Carnivore | 23 | 7 | 94 | 1 | ns |
| Trop1 | Productivity | Herbivore | Planktivore | 25 | 25 | 421 | 0.353 | ns |
| Trop1 | Productivity | Herbivore | Omnivore | 25 | 23 | 571 | <0.001 | *** |
| Trop1 | Productivity | Herbivore | Invertivore | 25 | 25 | 417 | 0.429 | ns |
| Trop1 | Productivity | Herbivore | Carnivore | 25 | 1 | 25 | 0.769 | ns |
| Trop1 | Productivity | Planktivore | Omnivore | 25 | 23 | 428 | 0.032 | * |
| Trop1 | Productivity | Planktivore | Invertivore | 25 | 25 | 264 | 1 | ns |
| Trop1 | Productivity | Planktivore | Carnivore | 25 | 1 | 14 | 1 | ns |
| Trop1 | Productivity | Omnivore | Invertivore | 23 | 25 | 23 | <0.001 | *** |
| Trop1 | Productivity | Omnivore | Carnivore | 23 | 1 | 3 | 1 | ns |
| Trop1 | Productivity | Invertivore | Carnivore | 25 | 1 | 23 | 1 | ns |
| Trop2 | Productivity | Herbivore | Planktivore | 25 | 24 | 421 | 0.15 | ns |
| Trop2 | Productivity | Herbivore | Omnivore | 25 | 22 | 535 | <0.001 | *** |
| Trop2 | Productivity | Herbivore | Invertivore | 25 | 25 | 522 | <0.001 | *** |
| Trop2 | Productivity | Herbivore | Carnivore | 25 | 8 | 199 | <0.001 | *** |
| Trop2 | Productivity | Planktivore | Omnivore | 24 | 22 | 376 | 0.132 | ns |
| Trop2 | Productivity | Planktivore | Invertivore | 24 | 25 | 282 | 1 | ns |
| Trop2 | Productivity | Planktivore | Carnivore | 24 | 8 | 139 | 0.635 | ns |
| Trop2 | Productivity | Omnivore | Invertivore | 22 | 25 | 71 | <0.001 | *** |
| Trop2 | Productivity | Omnivore | Carnivore | 22 | 8 | 102 | 1 | ns |
| Trop2 | Productivity | Invertivore | Carnivore | 25 | 8 | 185 | <0.001 | *** |
| Trop3 | Productivity | Herbivore | Planktivore | 21 | 20 | 360 | <0.001 | *** |
| Trop3 | Productivity | Herbivore | Omnivore | 21 | 19 | 345 | <0.001 | *** |
| Trop3 | Productivity | Herbivore | Invertivore | 21 | 24 | 351 | 0.24 | ns |
| Trop3 | Productivity | Herbivore | Carnivore | 21 | 4 | 74 | 0.149 | ns |
| Trop3 | Productivity | Planktivore | Omnivore | 20 | 19 | 171 | 1 | ns |
| Trop3 | Productivity | Planktivore | Invertivore | 20 | 24 | 151 | 0.36 | ns |
| Trop3 | Productivity | Planktivore | Carnivore | 20 | 4 | 38 | 1 | ns |
| Trop3 | Productivity | Omnivore | Invertivore | 19 | 24 | 147 | 0.482 | ns |
| Trop3 | Productivity | Omnivore | Carnivore | 19 | 4 | 33 | 1 | ns |
| Trop3 | Productivity | Invertivore | Carnivore | 24 | 4 | 62 | 1 | ns |
| Sub | Turnover | Herbivore | Planktivore | 23 | 25 | 23 | <0.001 | *** |
| Sub | Turnover | Herbivore | Omnivore | 23 | 9 | 32 | 0.018 | * |
| Sub | Turnover | Herbivore | Invertivore | 23 | 25 | 80 | <0.001 | *** |
| Sub | Turnover | Herbivore | Carnivore | 23 | 6 | 75 | 1 | ns |
| Sub | Turnover | Planktivore | Omnivore | 25 | 9 | 155 | 1 | ns |
| Sub | Turnover | Planktivore | Invertivore | 25 | 25 | 526 | <0.001 | *** |
| Sub | Turnover | Planktivore | Carnivore | 25 | 6 | 150 | <0.001 | *** |
| Sub | Turnover | Omnivore | Invertivore | 9 | 25 | 140 | 1 | ns |
| Sub | Turnover | Omnivore | Carnivore | 9 | 6 | 50 | 0.048 | * |
| Sub | Turnover | Invertivore | Carnivore | 25 | 6 | 142 | 0.002 | ** |
| Trans | Turnover | Herbivore | Planktivore | 25 | 16 | 9 | <0.001 | *** |
| Trans | Turnover | Herbivore | Omnivore | 25 | 15 | 179 | 1 | ns |
| Trans | Turnover | Herbivore | Invertivore | 25 | 23 | 142 | 0.022 | * |
| Trans | Turnover | Herbivore | Carnivore | 25 | 7 | 128 | 0.675 | ns |
| Trans | Turnover | Planktivore | Omnivore | 16 | 15 | 222 | <0.001 | *** |
| Trans | Turnover | Planktivore | Invertivore | 16 | 23 | 315 | <0.001 | *** |
| Trans | Turnover | Planktivore | Carnivore | 16 | 7 | 112 | <0.001 | *** |
| Trans | Turnover | Omnivore | Invertivore | 15 | 23 | 116 | 0.947 | ns |
| Trans | Turnover | Omnivore | Carnivore | 15 | 7 | 74 | 1 | ns |
| Trans | Turnover | Invertivore | Carnivore | 23 | 7 | 142 | 0.014 | * |
| Trop1 | Turnover | Herbivore | Planktivore | 25 | 25 | 251 | 1 | ns |
| Trop1 | Turnover | Herbivore | Omnivore | 25 | 23 | 279 | 1 | ns |
| Trop1 | Turnover | Herbivore | Invertivore | 25 | 25 | 259 | 1 | ns |
| Trop1 | Turnover | Herbivore | Carnivore | 25 | 1 | 22 | 1 | ns |
| Trop1 | Turnover | Planktivore | Omnivore | 25 | 23 | 340 | 1 | ns |
| Trop1 | Turnover | Planktivore | Invertivore | 25 | 25 | 355 | 1 | ns |
| Trop1 | Turnover | Planktivore | Carnivore | 25 | 1 | 16 | 1 | ns |
| Trop1 | Turnover | Omnivore | Invertivore | 23 | 25 | 260 | 1 | ns |
| Trop1 | Turnover | Omnivore | Carnivore | 23 | 1 | 16 | 1 | ns |
| Trop1 | Turnover | Invertivore | Carnivore | 25 | 1 | 21 | 1 | ns |
| Trop2 | Turnover | Herbivore | Planktivore | 25 | 24 | 131 | 0.005 | ** |
| Trop2 | Turnover | Herbivore | Omnivore | 25 | 22 | 231 | 1 | ns |
| Trop2 | Turnover | Herbivore | Invertivore | 25 | 25 | 299 | 1 | ns |
| Trop2 | Turnover | Herbivore | Carnivore | 25 | 8 | 121 | 1 | ns |
| Trop2 | Turnover | Planktivore | Omnivore | 24 | 22 | 363 | 0.293 | ns |
| Trop2 | Turnover | Planktivore | Invertivore | 24 | 25 | 454 | 0.017 | * |
| Trop2 | Turnover | Planktivore | Carnivore | 24 | 8 | 163 | 0.024 | * |
| Trop2 | Turnover | Omnivore | Invertivore | 22 | 25 | 305 | 1 | ns |
| Trop2 | Turnover | Omnivore | Carnivore | 22 | 8 | 119 | 1 | ns |
| Trop2 | Turnover | Invertivore | Carnivore | 25 | 8 | 124 | 1 | ns |
| Trop3 | Turnover | Herbivore | Planktivore | 21 | 20 | 117 | 0.147 | ns |
| Trop3 | Turnover | Herbivore | Omnivore | 21 | 19 | 189 | 1 | ns |
| Trop3 | Turnover | Herbivore | Invertivore | 21 | 24 | 175 | 0.818 | ns |
| Trop3 | Turnover | Herbivore | Carnivore | 21 | 4 | 25 | 1 | ns |
| Trop3 | Turnover | Planktivore | Omnivore | 20 | 19 | 249 | 1 | ns |
| Trop3 | Turnover | Planktivore | Invertivore | 20 | 24 | 234 | 1 | ns |
| Trop3 | Turnover | Planktivore | Carnivore | 20 | 4 | 43 | 1 | ns |
| Trop3 | Turnover | Omnivore | Invertivore | 19 | 24 | 163 | 1 | ns |
| Trop3 | Turnover | Omnivore | Carnivore | 19 | 4 | 27 | 1 | ns |
| Trop3 | Turnover | Invertivore | Carnivore | 24 | 4 | 49 | 1 | ns |

**Table S4 GLMM outputs of energy flow metrics for the 14 selected intrinsic variables.** Significant variables (*p*<0.05) are indicated with asterisks. Abbreviations and full names of variables are provided in Table S1.

|  | **Estimate** | **Std. Error** | **z value** | **Pr(>|z|)** |
| --- | --- | --- | --- | --- |
| **Standing biomass** |  |  |  |  |
| (Intercept) | 0.013 | 0.905 | 0.014 | 0.989 |
| AL_artcal | -0.958 | 0.779 | -1.230 | 0.219 |
| CCA | 1.239 | 0.597 | 2.076 | 0.038* |
| HC_arborescent | 0.184 | 0.526 | 0.350 | 0.726 |
| HC_bushy | 0.215 | 0.358 | 0.600 | 0.549 |
| HC_encrusting | 0.918 | 0.462 | 1.989 | 0.047* |
| HC_foliose | 0.070 | 0.395 | 0.177 | 0.859 |
| HC_massive | -0.461 | 0.543 | -0.849 | 0.396 |
| HC_tabular | -0.205 | 0.403 | -0.509 | 0.611 |
| OC_bushy | 0.733 | 0.674 | 1.087 | 0.277 |
| OC_clustered | -0.077 | 1.243 | -0.062 | 0.951 |
| OC_digitate | -0.615 | 0.471 | -1.306 | 0.191 |
| OC_lobate | 0.006 | 0.569 | 0.011 | 0.991 |
| Turf | -0.093 | 0.563 | -0.165 | 0.869 |
| ZO_encrusting | 0.446 | 0.497 | 0.897 | 0.370 |
| **Productivity** |  |  |  |  |
| (Intercept) | -5.581 | 2.224 | -2.510 | 0.012* |
| AL_artcal | -2.397 | 1.940 | -1.235 | 0.217 |
| CCA | 3.408 | 1.560 | 2.184 | 0.029* |
| HC_arborescent | 0.593 | 1.249 | 0.475 | 0.635 |
| HC_bushy | 0.584 | 0.853 | 0.684 | 0.494 |
| HC_encrusting | 1.224 | 1.175 | 1.042 | 0.298 |
| HC_foliose | -0.445 | 0.873 | -0.509 | 0.611 |
| HC_massive | 0.116 | 1.393 | 0.083 | 0.934 |
| HC_tabular | -1.354 | 0.980 | -1.382 | 0.167 |
| OC_bushy | 2.483 | 1.660 | 1.496 | 0.135 |
| OC_clustered | -4.440 | 2.899 | -1.532 | 0.126 |
| OC_digitate | -0.182 | 1.204 | -0.151 | 0.880 |
| OC_lobate | -0.921 | 1.242 | -0.741 | 0.459 |
| Turf | -0.326 | 1.315 | -0.248 | 0.804 |
| ZO_encrusting | 0.267 | 1.161 | 0.230 | 0.818 |
| **Turnover** |  |  |  |  |
| (Intercept) | -0.871 | 1.398 | -0.623 | 0.533 |
| AL_artcal | 0.113 | 1.384 | 0.082 | 0.935 |
| CCA | 0.535 | 0.906 | 0.590 | 0.555 |
| HC_arborescent | 0.523 | 0.800 | 0.654 | 0.513 |
| HC_bushy | 0.085 | 0.535 | 0.159 | 0.874 |
| HC_encrusting | -1.239 | 0.678 | -1.827 | 0.068 |
| HC_foliose | 0.417 | 0.572 | 0.728 | 0.467 |
| HC_massive | 0.602 | 0.775 | 0.777 | 0.437 |
| HC_tabular | -0.342 | 0.563 | -0.607 | 0.544 |
| OC_bushy | 0.216 | 1.084 | 0.200 | 0.842 |
| OC_clustered | -1.884 | 1.750 | -1.077 | 0.282 |
| OC_digitate | 0.955 | 0.786 | 1.215 | 0.224 |
| OC_lobate | -0.614 | 0.818 | -0.751 | 0.453 |
| Turf | -0.142 | 0.888 | -0.160 | 0.873 |
| ZO_encrusting | 0.044 | 0.753 | 0.058 | 0.954 |

**Table S5** **GLMM outputs of energy flow metrics for the 10 extrinsic variables.** Significant variables (*p*<0.05) are indicated with asterisks. Human_pop: human population, PP: primary production, PAR: photosynthetically available radiation, SS: stable substrate, US: unstable substrate, SC: surface complexity, PLC: planform curvature, PROC: planform curvature. Numbers following PLC and PROC refer to the resolution of structural complexity (4 represents fine scale structural complexity, while 32 represents rough scale structural complexity).

|  | **Estimate** | **Std. Error** | **z value** | **Pr(>|z|)** |
| --- | --- | --- | --- | --- |
| **Standing biomass** |  |  |  |  |
| (Intercept) | 1.092 | 0.868 | 1.259 | 0.208 |
| Human_pop | 0.055 | 0.045 | 1.217 | 0.223 |
| PP | -2.804 | 1.782 | -1.573 | 0.116 |
| PAR | -0.301 | 3.244 | -0.093 | 0.926 |
| SS | 1.519 | 0.242 | 6.275 | <0.001* |
| US | -0.209 | 0.196 | -1.064 | 0.288 |
| PROC4 | -1.820 | 1.925 | -0.945 | 0.345 |
| PROC32 | -0.476 | 0.691 | -0.689 | 0.491 |
| PLC4 | 4.047 | 1.597 | 2.535 | 0.011* |
| PLC32 | -1.926 | 0.690 | -2.793 | 0.005* |
| SC | -1.405 | 0.899 | -1.563 | 0.118 |
| **Productivity** |  |  |  |  |
| (Intercept) | -4.074 | 2.116 | -1.925 | 0.054 |
| Human_pop | 0.197 | 0.114 | 1.737 | 0.082 |
| PP | -10.308 | 5.763 | -1.789 | 0.074 |
| PAR | 3.697 | 8.729 | 0.424 | 0.672 |
| SS | 3.045 | 0.658 | 4.626 | <0.001* |
| US | -1.058 | 0.512 | -2.068 | 0.039* |
| PROC4 | 2.497 | 4.499 | 0.555 | 0.579 |
| PROC32 | -2.655 | 1.754 | -1.513 | 0.130 |
| PLC4 | 4.696 | 3.764 | 1.248 | 0.212 |
| PLC32 | -5.581 | 1.814 | -3.076 | 0.002* |
| SC | -1.694 | 2.269 | -0.747 | 0.455 |
| **Turnover** |  |  |  |  |
| (Intercept) | -1.376 | 1.384 | -0.995 | 0.320 |
| Human_pop | 0.047 | 0.072 | 0.659 | 0.510 |
| PP | -2.501 | 3.562 | -0.702 | 0.483 |
| PAR | 1.899 | 6.042 | 0.314 | 0.753 |
| SS | -0.919 | 0.410 | -2.240 | 0.025* |
| US | -0.567 | 0.328 | -1.730 | 0.084 |
| PROC4 | 6.275 | 2.787 | 2.251 | 0.024* |
| PROC32 | -1.034 | 1.060 | -0.975 | 0.329 |
| PLC4 | -5.524 | 2.420 | -2.282 | 0.022* |
| PLC32 | -0.640 | 1.221 | -0.524 | 0.600 |
| SC | 2.216 | 1.506 | 1.471 | 0.141 |





**Fig. S1 Energy flows among observed fish families. a** Standing biomass, **b** productivity, and **c** turnover among 29 recorded fish families. Each dot represents the energy flow metric of a given family in each transect. All fish were listed and ranked in ascending order of mean values for a given metric.





**Fig. S2 QQ-plots and histograms of fish energy flows at the transect level.** Each dot represents energy flows of transects. **a** Standing biomass followed a normal distribution. While comparing equality of variance, Levene’s test indicated unequal variances (F(4, 120)=2.53, *p*=0.04) among the five regions. Therefore, Welch’s ANOVA followed by Games-Howell test was implemented. Gaussian distribution was used as the identity link in the model. **b** Productivity failed to fit normal distribution and exhibited positive skewness. As a result, Gamma distribution with a log link was used in the model. **c** Turnover failed to fit normal distribution. Similarly, Gamma distribution with a log link was used in the model.





**Fig. S3 QQ-plots and histograms of fish energy flows at the site level.** Each dot represents energy flows of sites. **a** Standing biomass followed normal distribution. Therefore, Gaussian distribution with an identity link was used in the model. **b** Productivity failed to fit normal distribution and exhibited positive skewness. As a result, Gamma distribution with a log link was used in the model. **c** Turnover failed to fit normal distribution. Similarly, Gamma distribution with a log link was used in the model.





**Fig. S4 Relationship between standing biomass and selected biotic variables.** The y-axis displays log-transformed biomass, while the x-axis represents the cover of 14 corresponding morpho-functional groups. Abbreviations are defined in Table S1.





**Fig. S5** **Relationship between productivity and selected biotic variables.** The y-axis displays productivity, while the x-axis represents the cover of 14 corresponding morpho-functional groups. Abbreviations are defined in Table S1.





**Fig. S6** **Relationship between turnover and selected biotic variables.** The y-axis displays turnover, while the x-axis represents cover of 14 corresponding morpho-functional groups. Abbreviations are defined in Table S1.





**Fig. S7** **Relationship between standing biomass and selected abiotic variables.** The y-axis displays log-transformed biomass, while the x-axis represents the values of 10 corresponding anthropogenic and environmental variables. Values of human population were log-transformed. Human_pop: human population (inhabitant km-2); PAR: photosynthetically available radiation (Einstein m-2 day-1); PP: primary production (mg m-2 day-1); PLC: planform curvature; PROC: profile curvature; SC: surface complexity; SS: stable substrate (%); US: unstable substrate (%). Values following PLC and PROC represent scales of curvature: 32 represents rough-scale, 4 represents fine scale curvatures.





**Fig. S8** **Relationship between productivity and selected abiotic variables.** The y-axis displays productivity, while the x-axis represents the values of 10 corresponding anthropogenic and environmental variables. Values of human population were log-transformed. Human_pop: human population (inhabitant km-2); PAR: photosynthetically available radiation (Einstein m-2 day-1); PP: primary production (mg m-2 day-1); PLC: planform curvature; PROC: profile curvature; SC: surface complexity; SS: stable substrate (%); US: unstable substrate (%). Values behind PLC and PROC represent scales of curvatures: 32 represents rough-scale, 4 represents fine scale curvatures.



**Fig. S9 Relationship between turnover and selected abiotic variables.** The y-axis displays turnover, while the x-axis represents the values of 10 corresponding anthropogenic and environmental variables. Values of human population were log-transformed. Human_pop: human population (inhabitant km-2); PAR: photosynthetically available radiation (Einstein m-2 day-1); PP: primary production (mg m-2 day-1); PLC: planform curvature; PROC: profile curvature; SC: surface complexity; SS: stable substrate (%); US: unstable substrate (%). Values behind PLC and PROC represent scales of curvatures: 32 represents rough-scale, 4 represents fine scale curvatures.





**Fig. S10** **Residual diagnostics for GLMMs of biotic drivers.** Residuals of **a** standing biomass, **b** productivity, and **c** turnover models. Residuals of the three models followed normal distribution. Two outliers (labeled with red asterisk) in standing biomass and one outlier in productivity were detected. Overdispersion of residuals in the three models were suggested.





**Fig. S11** **Residual diagnostics for GLMMs of abiotic drivers.** Residuals of **a** standing biomass, **b** productivity, and **c** turnover models. Residuals followed normal distribution, and no outlier or overdispersion were detected in the three models.

**References**

Center for International Earth Science Information Network - CIESIN - Columbia University (2018) Gridded Population of the World, Version 4 (GPWv4): Population Count Adjusted to Match 2015 Revision of UN WPP Country Totals, Revision 11 NASA Socioeconomic Data and Applications Center (SEDAC). https://doi.org/10.7927/H4PN93PB

European Union-Copernicus Marine Service (2022) Global Ocean Colour (Copernicus-GlobColour), Bio-Geo-Chemical, L4 (monthly and interpolated) from Satellite Observations (1997-ongoing) [dataset]. Mercator Ocean International. https://doi.org/10.48670/MOI-00281

Helder NK, Burns JH, Green SJ (2022) Intra-habitat structural complexity drives the distribution of fish trait groups on coral reefs. Ecol Indic 142:109266. https://doi.org/10.1016/j.ecolind.2022.109266

Jenness JS (2004) Calculating landscape surface area from digital elevation models. Wildl Soc Bull 32: 829–839. https://doi.org/10.2193/0091-7648(2004)032[0829:CLSAFD]2.0.CO;2

Kennelly PJ (2009) Hill-shading techniques to enhance terrain maps. Proceedings of the International Cartographic Conference, Santiago, Chile. https://api.semanticscholar.org/CorpusID:36929358

Lee CL, Chao CS (2020) Oceanpedia (Vol. 1). My House Publication, a division of Cite Publishing Ltd.

Lee CL, Chao CS (2022) Oceanpedia (Vol. 2). My House Publication, a division of Cite Publishing Ltd.

Lin YV, Denis V (2019) Acknowledging differences: number, characteristics, and distribution of marine benthic communities along Taiwan coast. Ecosphere 10:e02803. https://doi.org/10.1002/ecs2.2803

Liu G, Heron SF, Eakin CM, Muller-Karger FE, Vega-Rodriguez, M, Guild LS, De La Cour JL, Geiger EF, Skirving WJ, Burgess TF (2014) Reef-scale thermal stress monitoring of coral ecosystems: new 5-km global products from NOAA Coral Reef Watch. Remote Sens 6:11579–11606. https://doi.org/10.3390/rs61111579

Morais RA, Bellwood DR (2020) Principles for estimating fish productivity on coral reefs. Coral Reefs 39:1221–1231. https://doi.org/10.1007/s00338-020-01969-9

NASA Goddard Space Flight Center, O. E. L., Ocean Biology Processing Group (2017) MODIS-Aqua Level 3 Mapped Photosynthetically Available Radiation Data Version R2018.0 [dataset]. NASA Ocean Biology Distributed Active Archive Center. https://doi.org/10.5067/AQUA/MODIS/L3M/PAR/2018

Shao KT (2024) Taiwan Fish Database. WWW Web electronic publication. http://fishdb.sinica.edu.tw Accessed 14 March 2024

Walbridge S, Slocum N, Pobuda M, Wright D (2018) Unified Geomorphological Analysis Workflows with Benthic Terrain Modeler. Geosciences 8:94. https://doi.org/10.3390/geosciences8030094

Zevenbergen LW, Thorne CR (1987) Quantitative analysis of land surface topography. Earth Surf Process Landf 12:47–56. https://doi.org/10.1002/esp.3290120107
